# Supplementary material
Source: PubMed Central journal article supplement (PMC6989956)
Supplement: BPH-177-402-s001.pdf [file BPH-177-402-s001.pdf]

## Supplement

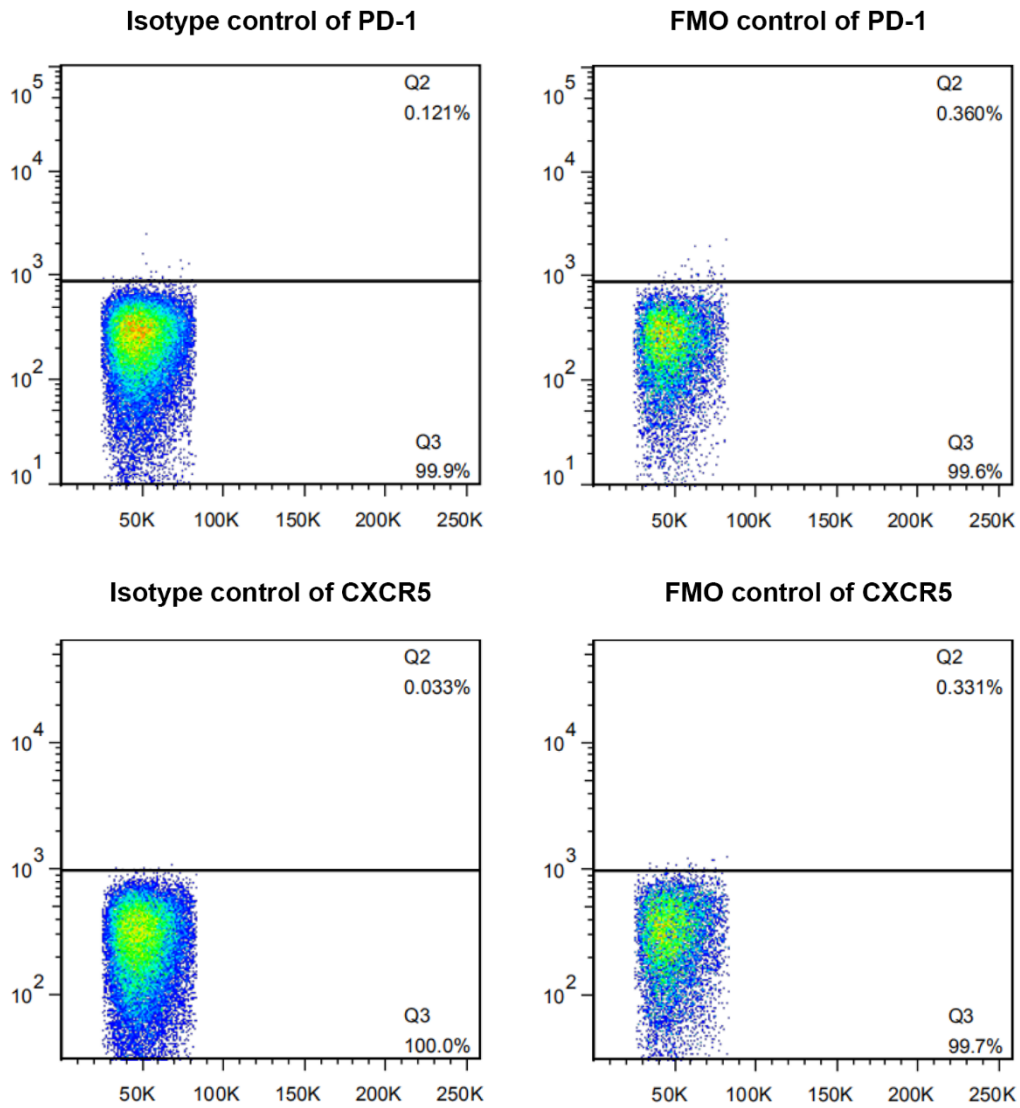

The FMO and isotype controls for PD1 and CXCR5. There was little fluorescence leakage in PD-1 channel or CXCR5 channel.
